# Supplementary material for: Clients’ satisfaction with quality of childbirth services: A comparative study between public and private facilities in Limuru Sub-County, Kiambu, Kenya
Source: PubMed Central journal article supplement (PMC5851550; doi:10.1371/journal.pone.0193593), 2018-03-14
Supplement: pone.0193593.s001.pdf [file pone.0193593.s001.pdf]

## Appendix 1

**Table 1: All parameters in the questionnaire**

---

| <b>Variable</b>                                                                                                                                                                          |
|------------------------------------------------------------------------------------------------------------------------------------------------------------------------------------------|
| Level of satisfaction with the time you spent waiting for health care providers to examine you                                                                                           |
| The staff kept checking on me thus I did not feel neglected / ignored during the waiting process                                                                                         |
| Staff treated my personal information with confidence                                                                                                                                    |
| Health facility provided privacy during vaginal examination.                                                                                                                             |
| During labour there were a lot of people who are non-staff around me which made me feel uncomfortable                                                                                    |
| Medical staff respected my privacy; I was not left exposed during delivery                                                                                                               |
| I was given pain relief during labour as the need arose ( <b>Pharmacological</b> and <b>Non-pharmacological</b> )                                                                        |
| I was given pain relief after delivery as the need arose. ( <b>Pharmacological</b> )                                                                                                     |
| The health staffs in the health facility are well suited to treat mothers during labour and delivery                                                                                     |
| equipment such as blood pressure machines used on me appeared to be in good working order                                                                                                |
| How would you describe your level of satisfaction with the way staff responded to your questions and concerns during labour and delivery                                                 |
| My labour companion was given guidance on how best to assist me (Giving me emotional support, providing me with basic needs etc)                                                         |
| My labour companion was made welcome during labour and delivery process                                                                                                                  |
| The midwife supported and encouraged me during labour                                                                                                                                    |
| When I had the urge to bear down, the midwife gave me clear guidance on how to do so                                                                                                     |
| I was satisfied with the way the midwife conducted my delivery                                                                                                                           |
| I was encouraged to breastfeed my baby within one hour after delivery to foster bonding                                                                                                  |
| I was informed about the health status of my baby immediately after delivery                                                                                                             |
| The health staff provided me with the information on how to detect danger signs on myself after delivery                                                                                 |
| The health staff provided me with the information on how to detect danger signs in my baby                                                                                               |
| I was provided with the information on how to take care of myself at home before discharge                                                                                               |
| I was provided with the information on how to take care of the baby at home before discharge                                                                                             |
| How would you rate your level of overall satisfaction with the treatment provided by the health staff of this facility from admission, during labour, during delivery and after delivery |

---

**Table 2: The proportions and mean satisfaction scores of respondents with the OBA services in public facility**

| <b>Public</b>                                                                                                                            |                             |                  |                 |                     |                                |                    |
|------------------------------------------------------------------------------------------------------------------------------------------|-----------------------------|------------------|-----------------|---------------------|--------------------------------|--------------------|
| <b>Variable</b>                                                                                                                          | <b>Completely satisfied</b> | <b>satisfied</b> | <b>Not sure</b> | <b>Dissatisfied</b> | <b>Completely dissatisfied</b> | <b>Mean (SD)</b>   |
| Level of satisfaction with the time you spent waiting for health care providers to examine you                                           | 120 (63.2)                  | 59 (31.1)        | 0 (0)           | 10 (5.3)            | 1 (0.5)                        | <b>4.51 (0.8)</b>  |
| The staff kept checking on me thus I did not feel neglected / ignored during the waiting process                                         | 127 (66.8)                  | 52 (27.4)        | 1 (0.5)         | 7 (3.7)             | 3 (1.6)                        | <b>4.54 (0.82)</b> |
| Staff treated my personal information with confidence                                                                                    | 154 (81.1)                  | 34 (17.9)        | 0 (0)           | 2 (1.1)             | 0 (0)                          | <b>4.79 (0.48)</b> |
| Health facility provided privacy during vaginal examination.                                                                             | 158 (83.2)                  | 26 (13.7)        | 1 (0.5)         | 5 (2.6)             | 0 (0)                          | <b>4.77 (0.59)</b> |
| During labour there were a lot of people who are non-staff around me which made me feel uncomfortable                                    | 140 (73.7)                  | 41 (21.6)        | 4 (2.1)         | 4 (2.1)             | 1 (0.5)                        | <b>4.66 (0.68)</b> |
| Medical staff respected my privacy; I was not left exposed during delivery                                                               | 137 (72.1)                  | 45 (23.7)        | 0 (0)           | 8 (4.2)             | 0 (0)                          | <b>4.64 (0.7)</b>  |
| I was given pain relief during labour as the need arose <b>(Pharmacological and Non-pharmacological)</b>                                 | 58 (30.5)                   | 84 (44.2)        | 4 (2.1)         | 42 (22.1)           | 2 (1.1)                        | <b>3.81(1.13)</b>  |
| I was given pain relief after delivery as the need arose. <b>(Pharmacological)</b>                                                       | 103 (54.2)                  | 65 (34.2)        | 1 (0.5)         | 20 (10.5)           | 1 (0.5)                        | <b>4.31 (0.96)</b> |
| The health staffs in the health facility are well suited to treat mothers during labour and delivery                                     | 89 (46.8)                   | 93 (48.9)        | 2 (1.1)         | 3 (1.6)             | 3 (1.6)                        | <b>4.38 (0.74)</b> |
| equipment such as blood pressure machines used on me appeared to be in good working order                                                | 121 (63.7)                  | 67 (35.3)        | 1 (0.5)         | 0 (0)               | 1 (0.5)                        | <b>4.62 (0.56)</b> |
| How would you describe your level of satisfaction with the way staff responded to your questions and concerns during labour and delivery | 153 (80.5)                  | 30 (15.8)        | 2 (1.1)         | 3 (1.6)             | 1 (0.5)                        | <b>4.75 (0.61)</b> |
| My labour companion was given guidance on how best to assist me (Giving me emotional support, providing me with basic needs etc)         | 3 (1.6)                     | 5 (2.6)          | 0 (0)           | 0 (0)               | 0 (0)                          | <b>1.97 (0.3)</b>  |
| My labour companion was made welcome during labour and delivery process                                                                  | 1 (0.5)                     | 1 (0.5)          | 0 (0)           | 5 (2.6)             | 1 (0.5)                        | <b>2.5 (1.3)</b>   |
| The midwife supported and encouraged me during labour                                                                                    | 102 (53.7)                  | 53 (27.9)        | 4 (2.1)         | 29 (15.3)           | 2 (1.1)                        | <b>4.18 (1.11)</b> |
| When I had the urge to bear down, the midwife gave                                                                                       | 138 (72.6)                  | 37 (19.5)        | 3 (1.6)         | 10 (5.3)            | 2 (1.1)                        | <b>4.57 (0.85)</b> |

me clear guidance on how to do so

|                                                                                                                                                                                          |            |           |         |           |         |                    |
|------------------------------------------------------------------------------------------------------------------------------------------------------------------------------------------|------------|-----------|---------|-----------|---------|--------------------|
| I was satisfied with the way the midwife conducted my delivery                                                                                                                           | 135 (71.1) | 42 (22.1) | 2 (1.1) | 9 (4.7)   | 2 (1.1) | <b>4.57 (0.82)</b> |
| I was encouraged to breastfeed my baby within one hour after delivery to foster bonding                                                                                                  | 128 (67.4) | 36 (18.9) | 3 (1.6) | 21 (11.1) | 2 (1.1) | <b>4.41 (1.03)</b> |
| I was informed about the health status of my baby immediately after delivery                                                                                                             | 117 (61.6) | 67 (35.3) | 0 (0)   | 5 (2.6)   | 1 (0.5) | <b>4.55 (0.69)</b> |
| The health staff provided me with the information on how to detect danger signs on myself after delivery                                                                                 | 108 (56.8) | 60 (31.6) | 2 (1.1) | 18 (9.5)  | 2 (1.1) | <b>4.34 (0.97)</b> |
| The health staff provided me with the information on how to detect danger signs in my baby                                                                                               | 109 (57.4) | 32 (16.8) | 2 (1.1) | 45 (23.7) | 2 (1.1) | <b>4.06 (1.28)</b> |
| I was provided with the information on how to take care of myself at home before discharge                                                                                               | 106 (55.8) | 65 (34.2) | 1 (0.5) | 18 (9.5)  | 0 (0)   | <b>4.36 (0.9)</b>  |
| I was provided with the information on how to take care of the baby at home before discharge                                                                                             | 106 (55.8) | 66 (34.7) | 1 (0.5) | 17 (8.9)  | 0 (0)   | <b>4.37 (0.89)</b> |
| How would you rate your level of overall satisfaction with the treatment provided by the health staff of this facility from admission, during labour, during delivery and after delivery | 101 (53.2) | 82 (43.2) | 1 (0.5) | 5 (2.6)   | 1 (0.5) | <b>4.46 (0.7)</b>  |

---

**Table 3: The proportions and mean satisfaction scores of respondents with the OBA services in private facility**

| <b>Private</b>                                                                                                                           |                             |                  |                 |                     |                                |                     |
|------------------------------------------------------------------------------------------------------------------------------------------|-----------------------------|------------------|-----------------|---------------------|--------------------------------|---------------------|
| <b>Variable</b>                                                                                                                          | <b>Completely satisfied</b> | <b>satisfied</b> | <b>Not sure</b> | <b>Dissatisfied</b> | <b>Completely dissatisfied</b> | <b>Mean (SD)</b>    |
| Level of satisfaction with the time you spent waiting for health care providers to examine you                                           | 87 (73.1)                   | 28 (23.5)        | 0 (0)           | 1 (0.8)             | 3 (2.5)                        | <b>4.64 (0.77)</b>  |
| The staff kept checking on me thus I did not feel neglected / ignored during the waiting process                                         | 89 (74.8)                   | 28 (23.5)        | 0 (0)           | 1 (0.8)             | 1 (0.8)                        | <b>4.71 (0.6)</b>   |
| Staff treated my personal information with confidence                                                                                    | 96 (80.7)                   | 21 (17.6)        | 0 (0)           | 1 (0.8)             | 1 (0.8)                        | <b>4.76 (0.58)</b>  |
| Health facility provided privacy during vaginal examination.                                                                             | 97 (81.5)                   | 18 (15.1)        | 0 (0)           | 3 (2.5)             | 1 (0.8)                        | <b>4.74 (0.67)</b>  |
| During labour there were a lot of people who are non-staff around me which made me feel uncomfortable                                    | 80 (67.2)                   | 30 (25.2)        | 0 (0)           | 8 (6.7)             | 1 (0.8)                        | <b>4.51 (0.87)</b>  |
| Medical staff respected my privacy; I was not left exposed during delivery                                                               | 77 (64.7)                   | 36 (30.3)        | 0 (0)           | 4 (3.4)             | 2 (1.7)                        | <b>4.53 (0.81)</b>  |
| I was given pain relief during labour as the need arose <b>(Pharmacological and Non-pharmacological)</b>                                 | 36 (30.3)                   | 55 (46.2)        | 2 (1.7)         | 22 (18.5)           | 3 (2.5)                        | <b>3.81 (1.18)</b>  |
| I was given pain relief after delivery as the need arose. <b>(Pharmacological)</b>                                                       | 31 (26.1)                   | 66 (55.5)        | 2 (1.7)         | 18 (15.1)           | 2 (1.7)                        | <b>3.89 (1.02)</b>  |
| The health staffs in the health facility are well suited to treat mothers during labour and delivery                                     | 46 (38.7)                   | 72 (60.5)        | 0 (0)           | 1 (0.8)             | 0 (0)                          | <b>4.37 (0.54)</b>  |
| Equipment such as blood pressure machines used on me appeared to be in good working order                                                | 53 (44.5)                   | 66 (55.5)        | 0 (0)           | 0 (0)               | 0 (0)                          | <b>4.45 (0.5)</b>   |
| How would you describe your level of satisfaction with the way staff responded to your questions and concerns during labour and delivery | 83 (69.7)                   | 29 (24.4)        | 1 (0.8)         | 5 (4.2)             | 1 (0.8)                        | <b>4.58 (0.79)</b>  |
| My labour companion was given guidance on how best to assist me (Giving me emotional support, providing me with basic needs etc)         | 1 (0.8)                     | 0 (0)            | 0 (0)           | 104 (87.4)          | 13 (10.9)                      | <b>1.90 (0.46)</b>  |
| My labour companion was made welcome during labour and delivery process                                                                  | 6 (5.0)                     | 5 (4.2)          | 0 (0)           | 3 (2.5)             | 0 (0)                          | <b>2.69 (1.38)</b>  |
| The midwife supported and encouraged me during                                                                                           | 74 (62.2)                   | 39 (32.8)        | 0 (0)           | 5 (4.2)             | 1 (0.8)                        | <b>4.50 (0.822)</b> |

|                                                                                                                                                                                          |           |           |         |           |         |                    |
|------------------------------------------------------------------------------------------------------------------------------------------------------------------------------------------|-----------|-----------|---------|-----------|---------|--------------------|
| labour                                                                                                                                                                                   |           |           |         |           |         |                    |
| When I had the urge to bear down, the midwife gave me clear guidance on how to do so                                                                                                     | 85 (71.4) | 30 (25.2) | 0 (0)   | 2 (1.7)   | 1 (0.8) | <b>4.62 (0.78)</b> |
| I was satisfied with the way the midwife conducted my delivery                                                                                                                           | 89 (74.8) | 23 (19.3) | 2 (1.7) | 3 (2.5)   | 1 (0.8) | <b>4.62 (0.83)</b> |
| I was encouraged to breastfeed my baby within one hour after delivery to foster bonding                                                                                                  | 84 (70.6) | 26 (21.8) | 0 (0)   | 9 (7.6)   | 0 (0)   | <b>4.55 (0.84)</b> |
| I was informed about the health status of my baby immediately after delivery                                                                                                             | 61 (51.3) | 56 (47.1) | 1 (0.8) | 0 (0)     | 1 (0.8) | <b>4.48 (0.61)</b> |
| The health staff provided me with the information on how to detect danger signs on myself after delivery                                                                                 | 50 (42)   | 54 (45.4) | 3 (0.8) | 13 (10.9) | 1 (0.8) | <b>4.17 (0.96)</b> |
| The health staff provided me with the information on how to detect danger signs in my baby                                                                                               | 45 (37.8) | 42 (35.3) | 0 (0)   | 29 (24.4) | 3 (2.5) | <b>3.82 (1.25)</b> |
| I was provided with the information on how to take care of myself at home before discharge                                                                                               | 45 (37.8) | 49 (41.2) | 1 (0.8) | 23 (19.3) | 1 (0.8) | <b>3.96 (1.11)</b> |
| I was provided with the information on how to take care of the baby at home before discharge                                                                                             | 44 (37)   | 50 (42)   | 3 (0.8) | 23 (19.3) | 1 (0.8) | <b>3.95 (1.11)</b> |
| How would you rate your level of overall satisfaction with the treatment provided by the health staff of this facility from admission, during labour, during delivery and after delivery | 76 (63.9) | 41 (34.5) | 0 (0)   | 1 (0.8)   | 1 (0.8) | <b>4.60 (0.63)</b> |

---
