# Supplementary material for: Clients’ satisfaction with quality of childbirth services: A comparative study between public and private facilities in Limuru Sub-County, Kiambu, Kenya
Source: PLOS journal article supplement (doi:10.1371/journal.pone.0193593), 2018-03-14
Supplement: S5 (10.1371/journal.pone.0193593.s005) [file journal.pone.0193593.s005]

**LIMURU NURSING HOME L002**

**FOCUSED GROUP DISCUSSION 23-5-2015**

Respondents

Resp 1,Resp 2,Resp 3,Resp 4,Resp 5,Resp 6,Resp 7,Resp 8

**Q1.What can you comment on the time you spent before getting attended?**

**All Respondents-**I was attended to immediately and was satisfied

**Q2.How can you rate the level of satisfaction with the privacy during Vaginal examination?**

**All Respondents.**There was no problem.Every body was being examined when she is alone with the Nurses.

**Q3.What can you comment on level of privacy during delivery?**

**Resp.3.**I was alone with the Nurse and there was nobody else in the room.

**Q4.**What can you comment on confidentiality?

**Resp 4.**History taking was done in confidence and nobody else heard what I was being asked.

**Q5.Were you given any pain reliever during labour or told of anything you need to do in order to relieve pain?**

**All respondents-**We were not given any pain reliever

**Q6.How can you rate the level of satisfaction with the Nurses responses to your questions?**

**Resp 4.**The Nurse talked to us well and answered our questions

**Q7.What is the level of satisfaction with the support given during labour and delivery?**

**Resp 1.** I was not given any support during labour because I gave birth immediately.

**Resp.5.** I gave birth immediately

**Resp.3.** Got Support, delivered almost immediately, Nurse talked to me.

**Resp.2.** Got Support,Nurse talked to me well and reassured me.

**Resp.4** Got support, Nurse talked to me.

**Resp.6.**Got a lot of support from nurses,I was reassured and was satisfied

**Q8.What is the level of satisfaction with support during delivery**

**R2.** I was supported by three nurses and I delivered well.

**Resp 1,R5,R4&R3.** I got a lot of support from the Nurse.

**Q9. What is your comment on health education provided on self care and care of the baby before discharge.**

Resp 6. Niliambiwa ati mtoto akilia sana niambie daktari. "I was told that when the baby cries a lot I should tell the Doctor"

I was also told that when I bleed a lot I should inform the Doctor.

**Resp 1.** I was told that if the baby is not breastfeeding I should call the nurse.

Resp 6. My baby was not breastfeeding and when I called the Nurse, she came helped me and the baby breastfed

**Q11.** What is your comment on health education provided on care of baby after discharge?

**All Respondents-** No health education yet because this is done individually after clearing the hospital bill and ready to go home

**Q12. What is your overall satisfaction with care accorded from admission, during labour, delivery until discharge?**

**Resp 6-** I have not seen any problem and can recommend this facility to other patients.

**Resp. 1-R1,R5,R4,R9-** The services are good, the sheets are changed everyday, Nurses help you with the baby if you can not walk.

**Do you have any other comment?**

**Resp. 6,1,7,3,4** The services are perfect, there is no improvement needed
