# Supplementary material for: Clients’ satisfaction with quality of childbirth services: A comparative study between public and private facilities in Limuru Sub-County, Kiambu, Kenya
Source: PLoS One. 2018 Mar 14;13(3):e0193593. doi: 10.1371/journal.pone.0193593 (PMC5851550; doi:10.1371/journal.pone.0193593)
Supplement: S6 File — (PDF) [file pone.0193593.s007.pdf]

## OPEN ENDED QUESTIONS

### RESPONSES

#### CLIENTS SATISFACTION WITH CHILD BIRTH SERVICES “A COMPARISON BETWEEN PUBLIC AND PRIVATE FACILITIES IN KIAMBU COUNTY”

FACILITY CODE L002

| Respondent | <i>Did you have any positive feedback you would like to share regarding your delivery?<br/>Did you have any positive feedback you would like to share regarding your delivery?</i> | <i>Did you have any negative feedback you would like to share regarding your delivery?</i>                                                                                                                                                                                                                                          | <i>Would you recommend for a relative/friend to deliver in the facility. If YES Reason?</i>                                 | <i>Would you recommend for a relative/friend to deliver in the facility .If NO Reason?</i> |
|------------|------------------------------------------------------------------------------------------------------------------------------------------------------------------------------------|-------------------------------------------------------------------------------------------------------------------------------------------------------------------------------------------------------------------------------------------------------------------------------------------------------------------------------------|-----------------------------------------------------------------------------------------------------------------------------|--------------------------------------------------------------------------------------------|
| R51        | The facility staff treat patients well .Patients don't wait for long before being attended                                                                                         | none                                                                                                                                                                                                                                                                                                                                | Yes<br>Patients are treated well. Staff are every good ,caring and understanding. The facility is clean, we get enough food | .                                                                                          |
| R52        | The facility provides very good services .Nurses are caring.Keep it up                                                                                                             |                                                                                                                                                                                                                                                                                                                                     | Yes, The staff are caring, food is good, very good services ,clean facility and it's not expensive                          |                                                                                            |
| R53        | The place is very clean and the food is good. The Nurse who was helping me to deliver was very good, instructed me well on what to do,the services were very good                  | I was not happy with the way a Nurse slapped that mother( <i>pointing the opposite bed</i> ) in labour for not positioning her legs well since I was laboring in the same room as that mother                                                                                                                                       | The place is very clean and the food is very good                                                                           |                                                                                            |
| R54        | I was received well                                                                                                                                                                | I was not happy because my baby has not breastfed since yesterday and I have been telling the nurses and they are ignoring.I stayed for long during examination.The nurse who was examining me was not sure and I had to be examined by two Nurses ,When I was in labour ward I was not able to push and they slapped and pulled me | No                                                                                                                          | It is because of the way I was treated                                                     |

|            |                                                                                                 |                                                                                                                                                                                                                                                                                                                    |                                                                                                                                      |                                                                                                                                  |
|------------|-------------------------------------------------------------------------------------------------|--------------------------------------------------------------------------------------------------------------------------------------------------------------------------------------------------------------------------------------------------------------------------------------------------------------------|--------------------------------------------------------------------------------------------------------------------------------------|----------------------------------------------------------------------------------------------------------------------------------|
|            |                                                                                                 | down the delivery bed telling me to go away if I did not want to deliver .I struggled alone and went back to the delivery bed.                                                                                                                                                                                     |                                                                                                                                      |                                                                                                                                  |
| <b>R55</b> | There are very good services, the staff are good ,I did not take long before being attended to. | None                                                                                                                                                                                                                                                                                                               | Yes<br>Because they offer very good services ,the hospital is not expensive                                                          | .                                                                                                                                |
| <b>R56</b> | None                                                                                            | None                                                                                                                                                                                                                                                                                                               |                                                                                                                                      | No,I wouldn't recommend somebody to deliver here .The treatment I got was not good but it was may be due to my uncooperativeness |
| <b>R57</b> | I was happy with the way I was treated in this facility                                         | None                                                                                                                                                                                                                                                                                                               | Yes, I was very happy with the way I was treated during delivery so I would recommend a relative to come and deliver here            |                                                                                                                                  |
| <b>R58</b> | The staff really took good care of me from the time I arrived to the time of discharge          | None                                                                                                                                                                                                                                                                                                               | Yes, Because of good treatment                                                                                                       |                                                                                                                                  |
| <b>R59</b> | Nurses in this place are very cooperative, The Nurse rubbed my back when I was in lab our       | None                                                                                                                                                                                                                                                                                                               | Yes, The staff are very cooperative                                                                                                  |                                                                                                                                  |
| <b>R60</b> | None                                                                                            | The baby was almost coming out when I arrived at the facility gate and when my husband called out ,the male Nurse who was there ignored until the baby came out as we kept calling, RECC-During emergency Nurses should respond because I would have lost my baby had the driver not ran upstairs to ask for help. | Yes, Apart from neglecting me while I was delivering in the vehicle, the rest of the treatment was okay, The female Nurses are kind. |                                                                                                                                  |

|     |                                                                                                                          |                                                                                                                                                                                                                                                                       |                                                                                                             |   |
|-----|--------------------------------------------------------------------------------------------------------------------------|-----------------------------------------------------------------------------------------------------------------------------------------------------------------------------------------------------------------------------------------------------------------------|-------------------------------------------------------------------------------------------------------------|---|
|     |                                                                                                                          |                                                                                                                                                                                                                                                                       |                                                                                                             |   |
| R61 |                                                                                                                          | I did not have strength to push the baby and so many Nurses were around pressing my stomach to make the baby come out and I did not like it. Some Nurses come and tell you that if you joke we will throw you outside but others are good especially the male Nurses. | Yes, The goodness with this place is that I did not experience any beating as it happens in other hospitals |   |
| R62 | The services are good and the place is clean                                                                             | I was being examined in the ward in the presence of other patients and I was not happy with that                                                                                                                                                                      | Yes, Because the services are good                                                                          | . |
| R63 | The Nurses handled me well during delivery                                                                               | They are mixing the mothers who have delivered with those who have not delivered so I felt bad when visitors come and the those who have delivered tell of their experience while me I was still going through lab our pains                                          | Yes, The Nurses handle people well and no sharing of beds.                                                  |   |
| R64 | I was well supported by Nurses                                                                                           | There are a lot of vaginal examination .These frequent examinations result into a lot of pain                                                                                                                                                                         | Yes, They support people well                                                                               |   |
| R65 | Generally, the services are good; The Nurses are supportive and respond very fast. One cannot suffer and feels very safe | I was not happy because we were mixed with those who have already delivered yet me I was still going through lab our pains and I feel I was disturbing the ones who have delivered                                                                                    | Yes, The care here is good. The moment you enter, you are in safe hands.                                    |   |
| R66 | The staff are treating people very well                                                                                  | None                                                                                                                                                                                                                                                                  | Yes, Because the treatment here is good                                                                     |   |
| R67 | I received good services                                                                                                 | None                                                                                                                                                                                                                                                                  | The nurses treated me well.                                                                                 |   |
| R69 | I liked the services I received from the facility.                                                                       | None                                                                                                                                                                                                                                                                  | I liked the services I received .                                                                           |   |
| R68 | I liked how I was treated. The nurses helped me during delivery and 'took me slowly' when I was in pain.                 | None                                                                                                                                                                                                                                                                  | The nurses were good to me                                                                                  |   |
| R70 | I liked the services I got.                                                                                              | None                                                                                                                                                                                                                                                                  | I liked the treatment I got.                                                                                |   |

|     |                                                                                                           |                                                                                                                                                                                        |                                                      |  |
|-----|-----------------------------------------------------------------------------------------------------------|----------------------------------------------------------------------------------------------------------------------------------------------------------------------------------------|------------------------------------------------------|--|
| R71 | The treatment I got was good.                                                                             | I did not like the fact that they have a male security guard who walks in and out of the ward that made me uncomfortable.                                                              | The facility is clean and the nurses fast in action. |  |
| R72 | I liked the way I was treated when I came to this health facility                                         | The facility should provide each patient with her own bucket. I did not like the issue of sharing buckets for showering with other mothers                                             | Yes<br>Because the services are good                 |  |
| R73 | I like the services I received                                                                            |                                                                                                                                                                                        | Yes<br>Because The Nurses treated me well            |  |
| R74 | I like the way I was treated. In other hospitals I hear that Nurses beat people but here I was not beaten |                                                                                                                                                                                        | Yes<br>Because I like how I was treated              |  |
| R75 | I liked the services,the Nurses were good and took good care of me during delivery                        |                                                                                                                                                                                        | Yes<br>The Nurses treated me well                    |  |
| R76 | I like how I was treated                                                                                  |                                                                                                                                                                                        | Yes. Because of the good treatment                   |  |
| R77 | I was treated well                                                                                        |                                                                                                                                                                                        | Yes<br>Because I was well treated                    |  |
| R78 | When you call Nurses, they respond fast and they keep on checking on us                                   | Last time when I delivered here there were elderly Nurses who were a bit polite but these young Nurses shout at people when in labor<br><b>RECC.</b> They should treat people politely | Yes, Because the services are good                   |  |

|     |  |                                                                                                                                                                                                                                              |  |  |
|-----|--|----------------------------------------------------------------------------------------------------------------------------------------------------------------------------------------------------------------------------------------------|--|--|
| R79 |  | <p>I don't like the fact that as soon as a mother comes,she is induced without being given a chance to labour natural.I also did not like harassment ,they don't explain well and one is never given time to understandthe instructions.</p> |  |  |
|-----|--|----------------------------------------------------------------------------------------------------------------------------------------------------------------------------------------------------------------------------------------------|--|--|

|      |                                                                                            |  |                                                                              |  |
|------|--------------------------------------------------------------------------------------------|--|------------------------------------------------------------------------------|--|
| R80  | I liked the way I was treated                                                              |  | Yes<br>Because of the treatment I received                                   |  |
| R81  | The services were good                                                                     |  | Yes<br>Because of good services                                              |  |
| R82  | The treatment was good                                                                     |  | Yes ,Because of the treatment I got                                          |  |
| R83  | All services were good                                                                     |  | Yes. Because I was treated well                                              |  |
| R 90 |                                                                                            |  |                                                                              |  |
| R 91 | The services I got were good                                                               |  | Yes The staff are good                                                       |  |
| R92  | The staff are good and caring and I felt they understood and paid attention to my problems |  | Yes, The Nurses are not rude as I hear in public facilities                  |  |
| R 93 | The staff were quick to serve me and kept on checking on me so I never felt neglected      |  | Yes, The staff are quick to serve people and one will never feel neglected . |  |
| R94  | The services were good                                                                     |  | Yes, because the services are good                                           |  |
| R95  | Good facilities ,Good food and no sharing of beds                                          |  | Yes, The staff respond quickly and offer good support                        |  |
| R96  | Good services to mothers and good food                                                     |  | Yes ,Because the hospital is clean and the services are good                 |  |
| R97  | The staff take good care of patients and talk nicely to people                             |  | Yes<br>The staff are good people and talk nicely to patients.                |  |
| R98  | The staff coordinate well                                                                  |  | Yes, Because the staff coordinate well.                                      |  |
| R99  | The services were good                                                                     |  | Yes<br>I like the services and good treatment                                |  |
| R100 | The doctors admitted me very fast ,they listen to us and I was encouraged emotionally      |  | Yes, I was happy with the services I received                                |  |
|      |                                                                                            |  |                                                                              |  |

[illegible]
